# Supplementary material for: Whole Genome Sequencing-Based Comparison of Food Isolates of Cronobacter sakazakii
Source: Front Microbiol. 2019 Jul 2;10:1464. doi: 10.3389/fmicb.2019.01464 (PMC6615433; doi:10.3389/fmicb.2019.01464)
Supplement: Supplementary file 5 [file Table_5.XLSX]

## Sheet: Sheet3
TABLE S5 | Phage-associated regions in Cronobacter sakazakii C7 and C8
Isoletes	Region	Region Length	Completeness	Score	# CDS	Region Position	Possible Phage	GC %
C7	A1	33Kb	intact	150	37	94556-127561	PHAGE_Salmon_Fels_2_NC_010463 ,…...	0.5057
C7	A2	19.8Kb	incomplete	60	27	126709-146579	PHAGE_Salmon_SEN34_NC_028699 ,……	0.5651
C7	A3	45.3Kb	intact	150	63	223851-269159	PHAGE_Salmon_118970_sal3_NC_031940 ,……	0.5478
C8	S1	47Kb	questionable	80	59	541292-588299	PHAGE_Entero_Tyrion_NC_031077 ,……	0.5472
C8	S2	47.1Kb	intact	130	68	23795-70930	PHAGE_Edward_GF_2_NC_026611 ,……	0.5056
C8	S3	109.2Kb	intact	150	135	2-109224	PHAGE_Salmon_SSU5_NC_018843 ,……	0.506
